# Supplementary material for: Rapid learning in visual cortical networks
Source: eLife journal article supplement (doi:10.7554/elife.08417), 2015-08-26
Supplement: supp [file elife-08417-supp-v1.zip]

Archive with 2 entries (2 files):
- elife_poa_e08417_Figure_6_figure_supplement_1.pdf
- elife_poa_e08417_Figure_1_figure_supplement_1.pdf
