# Supplementary figures and images for: Rapid learning in visual cortical networks
Source: eLife journal article supplement (doi:10.7554/elife.08417), 2015-08-26

Figure 6 – figure supplement 1

**A**

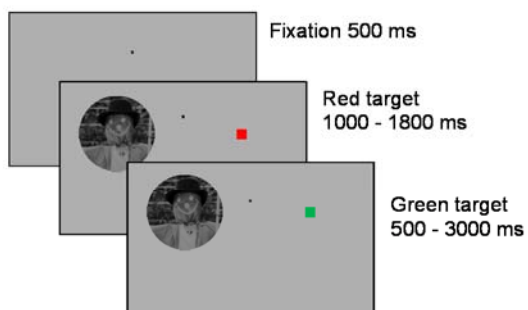

**B**

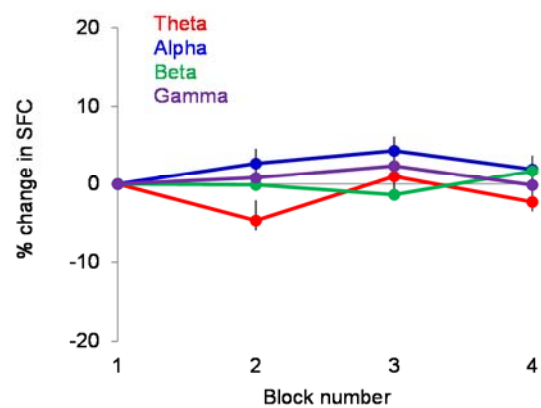

Supplement: supp [file elife-08417-supp-v1.zip › elife_poa_e08417_Figure_6_figure_supplement_1.pdf]

**Figure 1 – figure supplement 1**

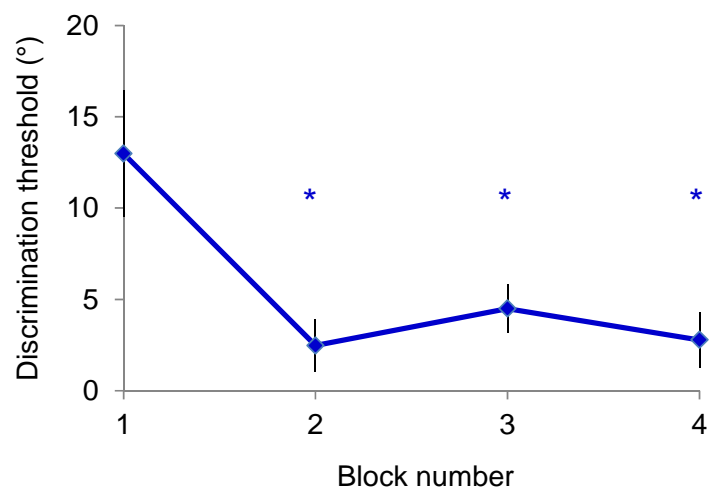

Supplement: supp [file elife-08417-supp-v1.zip › elife_poa_e08417_Figure_1_figure_supplement_1.pdf]
